# Supplementary material for: Synthesis of a New Phosphonate-Based Sorbent and Characterization of Its Interactions with Lanthanum (III) and Terbium (III)
Source: MDPI journal article supplement (doi:10.3390/polym13091513), 2021-05-08
Supplement: s1 [file s1]

## Synthesis of a new phosphonate-based sorbent and characterization of its interactions with lanthanum (III) and terbium (III)

Yuezhou Wei <sup>1,2</sup>, Khalid A.M. Salih <sup>1</sup>, Mohammed F. Hamza <sup>1,3\*</sup>, Toyohisa Fujita <sup>1</sup>, Enrique Rodríguez Castellón <sup>4\*</sup> and Eric Guibal <sup>5</sup>

<sup>1</sup> Guangxi Key Laboratory of Processing for Non-ferrous Metals and Featured Materials, School of Resources, Environment and Materials, Guangxi University, Nanning 530004, PR China; yzwei@gxu.edu.cn (Y.W.); Immortaltiger7@gmail.com (K.A.M.S.); m\_fouda21@hotmail.com (M.F.H.); fujitatomyohisa@gxu.edu.cn (T.F.)

<sup>2</sup> Guangdong Institute of Rare Metals, Guangdong Academy of Science, Guangzhou, China; yzwei@gxu.edu.cn (Y.W.)

<sup>3</sup> Nuclear Materials Authority, POB 530, El-Maadi, Cairo, Egypt; m\_fouda21@hotmail.com (M.F.H.)

<sup>4</sup> Universidad de Malaga, Departamento de Química Inorgánica, Facultad de Ciencias, Malaga, Spain; castellon@uma.es (E.R.C.)

<sup>5</sup> IMT – Mines Ales, Polymers Composites & Hybrids (PCH), F-30319 Alès cedex, France; eric.guibal@mines-ales.fr (E.G.)

\* Correspondence: castellon@uma.es; Tel.: +34645263909 (E.R.C.) & m\_fouda21@hotmail.com Tel: +202-01116681228 (M.F.H)

**Table 1.** Optical micrographs for AlPEI, Cl-AlPEI, POH-AlPEI (and average bead size).

| Sample    | Optical micrograph                                                                   | Average size                |
|-----------|--------------------------------------------------------------------------------------|-----------------------------|
| AlPEI     | 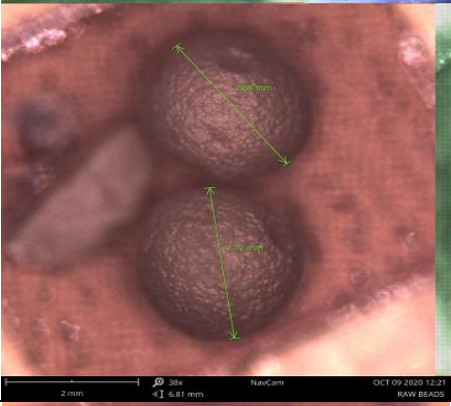   | $2.7 \pm 0.02 \text{ mm}$   |
| Cl-AlPEI  |   | $2.195 \pm 0.07 \text{ mm}$ |
| POH-AlPEI |  | $2.07 \pm 0.07 \text{ mm}$  |

**Table S2.** SEM micrographs of AlPEI, Cl-AlPEI, P-AlPEI and POH-AlPEI.

| Sample    | SEM                                                                                  | Crosscut                                                                              |
|-----------|--------------------------------------------------------------------------------------|---------------------------------------------------------------------------------------|
| AlPEI     | 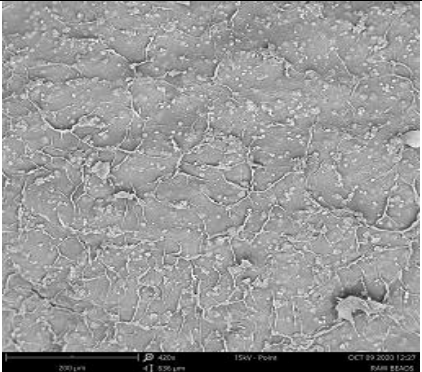   |    |
| Cl-AlPEI  |   |   |
| P*-AlPEI  |  |  |
| POH-AlPEI |  |  |

**Table 3.** Semi-quantitative EDX analysis of surface and crosscut section of A<sub>1</sub>PEI, Cl-A<sub>1</sub>PEI, P-A<sub>1</sub>PEI and POH-A<sub>1</sub>PEI.

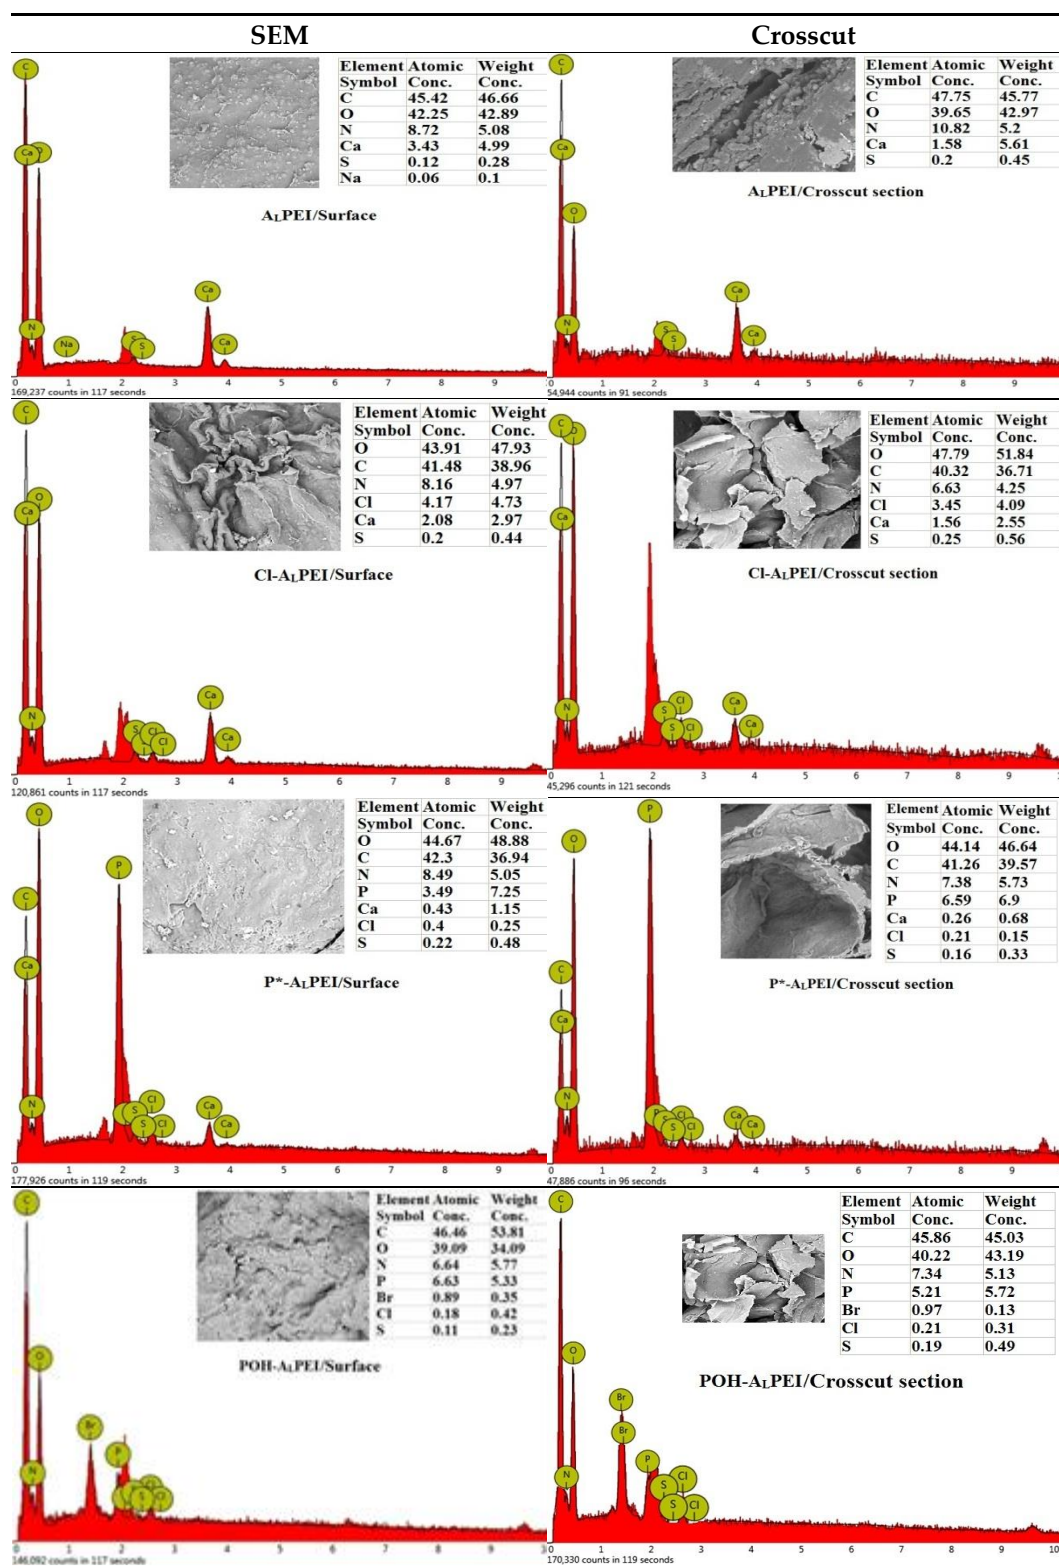

**Table 4.** Elemental analysis of A<sub>L</sub>PEI beads, intermediary products (epichlorohydrine-activated A<sub>L</sub>PEI, Cl-A<sub>L</sub>PEI, and phosphorylated A<sub>L</sub>PEI beads, P\*-A<sub>L</sub>PEI), and sorbent (de-esterified phosphorylated beads, POH-A<sub>L</sub>PEI).

| <b>Material</b>        | <b>C (%)</b> | <b>N (%)</b> | <b>N<sup>(a)</sup></b> | <b>H (%)</b> | <b>O (%)</b> | <b>O<sup>(a)</sup></b> | <b>S (%)</b> | <b>P (%)</b> | <b>P<sup>(a)</sup></b> |
|------------------------|--------------|--------------|------------------------|--------------|--------------|------------------------|--------------|--------------|------------------------|
| A <sub>L</sub> PEI     | 38.1         | 4.9          | 3.48                   | 5.89         | 34.9         | 21.80                  | 0.2          | 0.0          | 0.00                   |
| Cl-A <sub>L</sub> PEI  | 40.4         | 4.1          | 2.96                   | 6.03         | 37.6         | 23.52                  | 0.2          | 0.0          | 0.00                   |
| P*-A <sub>L</sub> PEI  | 41.4         | 3.9          | 2.79                   | 6.41         | 40.5         | 25.34                  | 0.1          | 6.5          | 2.10                   |
| POH-A <sub>L</sub> PEI | 39.1         | 3.9          | 2.78                   | 6.13         | 43.2         | 27.03                  | 0.1          | 6.8          | 2.20                   |

(a): molar units for element content (i.e., mmol Element g<sup>-1</sup>).

**Table 5.** FTIR assignments and wavenumbers (cm<sup>-1</sup>) of A<sub>1</sub>PEI, intermediary products (epichlorohydrine-activated A<sub>1</sub>PEI, Cl-A<sub>1</sub>PEI, and phosphorylated A<sub>1</sub>PEI beads, P\*-A<sub>1</sub>PEI), and sorbent (de-esterified phosphorylated beads, POH-A<sub>1</sub>PEI).

| Vibration                                                  | Ref.          | Wn. in ref.       | A <sub>1</sub> PEI | Cl- A <sub>1</sub> PEI | P*-A <sub>1</sub> PEI | POH- A <sub>1</sub> PEI |
|------------------------------------------------------------|---------------|-------------------|--------------------|------------------------|-----------------------|-------------------------|
| <b>O-H overlapped with N-H stretch</b>                     | <b>[1, 2]</b> | <b>3500 -3000</b> | <b>3402</b>        | <b>3383</b>            | <b>3477</b>           | 3371                    |
| Aliphatic C-H (stretch)                                    | [2]           | 2970-2750         | 2937/2775          | 2937/2767              | 2935/2767             | 2939/2767               |
| C=O ester (stretch)                                        | [2]           | 1750-1725         | 1753               | 1753                   | 1751                  | 1753                    |
| C=O amide (stretch)/ 1° and 2° amine bend (overlapped)     | [1, 3, 4]     | 1690-1630         | 1620               | 1622                   | 1631                  | 1622                    |
| C-H/ 1°/2° hydroxyl groups bend and -COO <sup>-</sup> salt | [1, 5-7]      | 1485–1260         | 1382               | 1381/1213              | 1381<br>(broad)       | 1382<br>(broad)         |
| Asymmetric P=O                                             | [8-11]        | 1350-1250         |                    |                        |                       |                         |
| Phosphate ion P(O) (stretch)                               | [12, 13]      | 1100-990          |                    |                        |                       |                         |
| C-C, C-O and C-N (stretch)                                 | [2, 14-17]    | 1350–1000         | 1033               | 1055/949               | 1076                  | 1055                    |
| OH (bend) out-of-plane                                     | [1, 2]        | 750–590           | 833                |                        |                       |                         |
| CH <sub>2</sub> -Cl                                        | [18]          | 700-800           |                    | 808                    |                       |                         |
| P-O-C band (stretch)                                       | [8-12]        | 570/1100-990      |                    |                        | 802/526               | 810/570                 |

**Table S6.** Assignments and interpretation of major XPS signals for A<sub>L</sub>PEI, intermediary products (i.e., Cl-A<sub>L</sub>PEI and P\*-A<sub>L</sub>PEI) and P2-A<sub>L</sub>PEI.

| Signal               | A <sub>L</sub> PEI |        | Cl-A <sub>L</sub> PEI |        | P*-A <sub>L</sub> PEI |        | POH-A <sub>L</sub> PEI |        | Assignment                       |
|----------------------|--------------------|--------|-----------------------|--------|-----------------------|--------|------------------------|--------|----------------------------------|
|                      | BE (eV)            | AF (%) | BE (eV)               | AF (%) | BE (eV)               | AF (%) | BE (eV)                | AF (%) |                                  |
| C 1s                 | 284.6              | 31.25  | 284.6                 | 37.59  | 284.8                 | 63.56  | 284.7                  | 42.33  | Adv. C, C-C,<br>-C=C-            |
|                      | 286.1              | 42.48  | 286.1                 | 41.96  | 286.5                 | 23.77  | 286.1                  | 41.51  | C-N, C-OH,<br>C-O-C, C-Cl        |
|                      | 287.6              | 20.85  | 287.4                 | 15.39  | 287.6                 | 6.46   | 287.3                  | 12.20  | C=O (amide)                      |
|                      | 288.9              | 5.41   | 288.8                 | 5.06   | 288.9                 | 6.21   | 288.9                  | 3.96   | Carboxylic                       |
| O 1s                 | 531.0              | 30.08  | 530.9                 | 28.85  |                       |        | 531.3                  | 29.21  | Carboxylate,<br>C=O (amide)      |
|                      | 532.5              | 58.31  | 532.3                 | 56.72  | 531.6                 | 38.19  |                        |        | C-OH                             |
|                      | 533.8              | 11.61  | 533.5                 | 14.43  |                       |        |                        |        | O-H (H <sub>2</sub> O)           |
|                      |                    |        |                       |        | 532.9                 | 61.81  | 532.6                  | 70.79  | O-P (phosphonic)                 |
| N 1s                 | 399.2              | 75.81  | 399.6                 | 72.09  |                       |        | 399.3                  | 46.75  | N (amine)                        |
|                      | 400.9              | 24.19  |                       |        |                       |        | 400.6                  | 19.66  | N (amide)                        |
|                      |                    |        |                       |        | 400.1                 | 58.15  |                        |        | N (amine or amide)               |
|                      |                    |        | 401.77                | 27.91  | 402.1                 | 41.85  | 402.0                  | 33.59  | Alkylammonium                    |
| P 2p                 |                    |        |                       |        | 133.8                 | 66.67  | 132.8                  | 66.67  | P 2p <sub>3/2</sub> (phosphonic) |
|                      |                    |        |                       |        | 134.6                 | 33.33  | 133.7                  | 33.33  | P 2p <sub>1/2</sub> (phosphonic) |
| S 2p                 | 167.7              | 66.67  | 168.0                 | 48.47  | 168.1                 | 66.67  | 168.1                  | (ε)    | S 2p <sub>3/2</sub> (sulfonic)   |
|                      | 168.9              | 33.33  | 169.2                 | 24.24  | 169.3                 | 33.33  | 169.3                  | (ε)    | S 2p <sub>1/2</sub> (sulfonic)   |
|                      |                    |        | 163.5                 | 18.2   |                       |        |                        | (ε)    | S 2p <sub>3/2</sub> (S-S)        |
|                      |                    |        | 164.7                 | 9.10   |                       |        |                        | (ε)    | S 2p <sub>1/2</sub> (S-S)        |
| Ca 2p <sub>3/2</sub> | 347.1              |        | 347.2                 |        | 347.5                 |        | 347.2                  | (ε)    | Ca <sup>2+</sup>                 |
| Cl 2p                |                    |        | 197.3                 | 11.86  |                       | (ε)    |                        |        | Cl 2p <sub>3/2</sub> (Cl)        |
|                      |                    |        | 198.9                 | 5.93   |                       | (ε)    |                        |        | Cl 2p <sub>1/2</sub> (Cl)        |

|       |       |                |       |       |                                    |
|-------|-------|----------------|-------|-------|------------------------------------|
| 199.9 | 54.81 | ( $\epsilon$ ) | 199.9 | 66.67 | Cl $2p_{3/2}$ (Cl-C covalent bond) |
| 201.5 | 27.40 | ( $\epsilon$ ) | 201.5 | 33.33 | Cl $2p_{1/2}$ (Cl-C covalent bond) |

---

( $\epsilon$ ): weak signal.



**Table S7.** FTIR assignments and wavenumbers (cm<sup>-1</sup>) of AlPEI before and after La (III) and Tb (III) (and after 5 cycles of sorption/desorption).

| Vibration                                                  | Ref.       | Wn. in ref. | AlPEI        | La(III) |          | Tb(III) |          |
|------------------------------------------------------------|------------|-------------|--------------|---------|----------|---------|----------|
|                                                            |            |             |              | loaded  | 5 cycles | loaded  | 5 cycles |
| O-H overlapped with N-H stretch                            | [2]        | 3500 -3000  | 3402         | 3392    | 3404     | 3397    | 3405     |
| Aliphatic C-H (stretch)                                    | [2]        | 2970-2850   | 2937<br>2775 | 2926    | 2933     | weak    | weak     |
| C=O ester (stretch)                                        | [2]        | 1750-1725   | 1753         |         |          | 1751    | 1753     |
| C=O amide (stretch)/ 1° and 2° amine bend (overlapped)     | [1, 4]     | 1690-1630   | 1620         | 1618    | 1618     | 1622    | 1622     |
| C-H/ 1°/2° hydroxyl groups bend and -COO <sup>-</sup> salt | [1, 5-7]   | 1485–1260   | 1382         | 1431    | 1429     | 1381    | 1382     |
| C-C, C-O and C-N (stretch)                                 | [2, 14-17] | 1350–1000   | 1033         | 1033    | 1033     | weak    | weak     |
| OH (bend) out-of-plane                                     | [1, 2]     | 750–590     | 833          | 815     | 817      | 835     | 833      |

**Table 8.** FTIR assignments and wavenumbers (cm<sup>-1</sup>) of POH-AlPEI before and after La (III) and Tb(III) (and after 5 cycles of sorption desorption).

| Vibration  |                                                       | Ref.       | Wn. in ref.       | POH-AlPEI    | La(III) |          | Tb(III) |          |
|------------|-------------------------------------------------------|------------|-------------------|--------------|---------|----------|---------|----------|
|            |                                                       |            |                   |              | loaded  | 5 cycles | loaded  | 5 cycles |
| <b>O-H</b> | <b>overlapped with N-H stretch</b>                    | [2]        | <b>3500 -3000</b> | 3371         | 3415    | 3404     | 3410    | 3404     |
|            | Aliphatic C-H (stretch)                               | [2]        | 2970-2850         | 2939<br>2767 | 2954    | 2954     | 2974    | 2953     |
|            | Ester C=O (stretch)                                   | [2]        | 1750-1725         | 1753         | 1701    | 1699     | 1703    | 1703     |
| C=O        | of amide (stretch)/ 1° and 2° amine bend (overlapped) | [1, 4]     | 1690-1630         | 1622         | 1618    | 1620     | 1624    | 1622     |
| C-H/       | 1°/2° hydroxyl groups bend and -COO <sup>-</sup> salt | [1, 5-7]   | 1485–1260         | 1382 (broad) | 1381    | 1383     | 1384    | 1383     |
|            | Asymmetric P=O                                        | [8-11]     | 1350-1250         |              |         |          |         |          |
|            | Phosphate ion P(O) (stretch)                          | [12, 13]   | 1000-1100         |              |         |          |         |          |
|            | C-C, C-O and C-N (stretch)                            | [2, 14-17] | 1350–1000         | 1055         | 1057    | 1057     | 1055    | 1057     |
|            | OH (bend) out-of-plane                                | [1, 2]     | 750–590           |              |         |          |         |          |
|            | P-O-C band (stretch)                                  | [11, 18]   | 570/1100-990      | 810/570      | 808/561 | 810/567  | 808/563 | 808/563  |
|            | Sulfate ion                                           | [1, 19]    | 680–610           |              | 617     | 617      |         |          |

**Table 9.** Assignments and interpretation of major XPS signals for POH-AlPEI before and after La (III) and Tb (III) sorption.

| Signal | POH-AlPEI |        | Sorbent + La (III)   |        | Sorbent + Tb (III) |        | Assignment                                |
|--------|-----------|--------|----------------------|--------|--------------------|--------|-------------------------------------------|
|        | BE (eV)   | AF (%) | BE (eV)              | AF (%) | BE (eV)            | AF (%) |                                           |
| C 1s   | 284.7     | 42.33  | 284.5                | 33.09  | 284.7              | 37.90  | Adv. C, C-C, -C=C-                        |
|        | 286.1     | 41.51  | 286.0                | 44.71  | 286.1              | 40.87  | C-N, C-OH, C-O-C                          |
|        | 287.3     | 12.20  | 287.3                | 14.75  | 287.4              | 14.34  | C=O (amide)                               |
|        | 288.9     | 3.96   | 288.6                | 7.45   | 288.7              | 6.89   | Carboxylic                                |
| O 1s   | 531.3     | 29.21  | 530.6                | 15.54  | 530.9              | 11.76  | Carboxylate, C=O (amide)                  |
|        | 532.6     | 70.79  | 532.2                | 69.21  | 532.4              | 63.00  | O-P (phosphonic)                          |
|        |           |        | 533.8                | 15.25  | 533.7              | 25.25  | O-H (H <sub>2</sub> O)                    |
| N 1s   | 399.3     | 46.75  | 399.6                | 57.76  | 398.4              | 59.23  | N (amine)                                 |
|        | 400.6     | 19.66  | 401.3                | 31.54  | 400.3              | 26.65  | N (amide)                                 |
|        | 402.0     | 33.59  | 402.4                | 10.71  | 401.3              | 14.13  | Alkylammonium                             |
| P 2p   | 132.8     | 66.67  | 134.4                | 66.67  | 133.3              | 66.67  | P 2p <sub>3/2</sub> (phosphonic)          |
|        | 133.7     | 33.33  | 135.2                | 33.33  | 134.1              | 33.33  | P 2p <sub>1/2</sub> (phosphonic)          |
| S 2p   | 168.1     | (ε)    | 167.9                | 66.67  | 167.9              | 66.67  | S 2p <sub>3/2</sub> (sulfonic, sulfate)   |
|        | 169.3     | (ε)    | 169.1                | 33.33  | 169.1              | 33.33  | S 2p <sub>1/2</sub> (sulfonic, sulfate)   |
| Ca 2p  | 347.2     | (ε)    |                      |        |                    |        | Ca 2p <sub>3/2</sub>                      |
| Cl 2p  | 199.9     | 66.67  |                      |        |                    |        | Cl 2p <sub>3/2</sub> (Cl-C covalent bond) |
|        | 201.5     | 33.33  |                      |        |                    |        | Cl 2p <sub>1/2</sub> (Cl-C covalent bond) |
| La 3d  |           |        | ~ 835 <sup>(a)</sup> |        |                    |        | La 3d <sub>5/2</sub> (La(III))            |
|        |           |        | ~ 851 <sup>(a)</sup> |        |                    |        | La 3d <sub>3/2</sub> (La(III))            |
| Tb 4d  |           |        |                      |        | 152-151            |        | Tb 4d <sub>5/2</sub> (Tb(IV))             |
|        |           |        |                      |        | ~ 149 (ε)          |        | Tb 4d <sub>5/2</sub> (Tb(III))            |

<sup>(a)</sup> Multiplets with ΔBEs ~ 3.2-3.4 eV

**Table S10.** SEM micrographs and semi-quantitative EDX analysis of surface of POH-A<sub>L</sub>PEI after La (III) and Tb (III) sorption at pH<sub>0</sub> 5.

| Sorbed metal ion | SEM    | EDX analysis                                                                                                                                                                                                                                                                                                                                                                                                                                                                                                                                                                                               |         |        |        |        |       |       |   |       |       |   |       |       |   |      |      |   |      |      |    |      |      |   |      |      |    |      |      |    |      |      |
|------------------|--------|------------------------------------------------------------------------------------------------------------------------------------------------------------------------------------------------------------------------------------------------------------------------------------------------------------------------------------------------------------------------------------------------------------------------------------------------------------------------------------------------------------------------------------------------------------------------------------------------------------|---------|--------|--------|--------|-------|-------|---|-------|-------|---|-------|-------|---|------|------|---|------|------|----|------|------|---|------|------|----|------|------|----|------|------|
| La (III)         |        | <table border="1"> <thead> <tr> <th>Element</th><th>Atomic</th><th>Weight</th></tr> <tr> <th>Symbol</th><th>Conc.</th><th>Conc.</th></tr> </thead> <tbody> <tr> <td>C</td><td>40.59</td><td>41.48</td></tr> <tr> <td>O</td><td>39.24</td><td>42.27</td></tr> <tr> <td>N</td><td>8.73</td><td>5.37</td></tr> <tr> <td>P</td><td>8.31</td><td>6.12</td></tr> <tr> <td>La</td><td>2.06</td><td>2.64</td></tr> <tr> <td>S</td><td>0.77</td><td>1.77</td></tr> <tr> <td>Cl</td><td>0.17</td><td>0.14</td></tr> <tr> <td>Na</td><td>0.13</td><td>0.21</td></tr> </tbody> </table> <p>POH-A<sub>L</sub>PEI+La</p> | Element | Atomic | Weight | Symbol | Conc. | Conc. | C | 40.59 | 41.48 | O | 39.24 | 42.27 | N | 8.73 | 5.37 | P | 8.31 | 6.12 | La | 2.06 | 2.64 | S | 0.77 | 1.77 | Cl | 0.17 | 0.14 | Na | 0.13 | 0.21 |
| Element          | Atomic | Weight                                                                                                                                                                                                                                                                                                                                                                                                                                                                                                                                                                                                     |         |        |        |        |       |       |   |       |       |   |       |       |   |      |      |   |      |      |    |      |      |   |      |      |    |      |      |    |      |      |
| Symbol           | Conc.  | Conc.                                                                                                                                                                                                                                                                                                                                                                                                                                                                                                                                                                                                      |         |        |        |        |       |       |   |       |       |   |       |       |   |      |      |   |      |      |    |      |      |   |      |      |    |      |      |    |      |      |
| C                | 40.59  | 41.48                                                                                                                                                                                                                                                                                                                                                                                                                                                                                                                                                                                                      |         |        |        |        |       |       |   |       |       |   |       |       |   |      |      |   |      |      |    |      |      |   |      |      |    |      |      |    |      |      |
| O                | 39.24  | 42.27                                                                                                                                                                                                                                                                                                                                                                                                                                                                                                                                                                                                      |         |        |        |        |       |       |   |       |       |   |       |       |   |      |      |   |      |      |    |      |      |   |      |      |    |      |      |    |      |      |
| N                | 8.73   | 5.37                                                                                                                                                                                                                                                                                                                                                                                                                                                                                                                                                                                                       |         |        |        |        |       |       |   |       |       |   |       |       |   |      |      |   |      |      |    |      |      |   |      |      |    |      |      |    |      |      |
| P                | 8.31   | 6.12                                                                                                                                                                                                                                                                                                                                                                                                                                                                                                                                                                                                       |         |        |        |        |       |       |   |       |       |   |       |       |   |      |      |   |      |      |    |      |      |   |      |      |    |      |      |    |      |      |
| La               | 2.06   | 2.64                                                                                                                                                                                                                                                                                                                                                                                                                                                                                                                                                                                                       |         |        |        |        |       |       |   |       |       |   |       |       |   |      |      |   |      |      |    |      |      |   |      |      |    |      |      |    |      |      |
| S                | 0.77   | 1.77                                                                                                                                                                                                                                                                                                                                                                                                                                                                                                                                                                                                       |         |        |        |        |       |       |   |       |       |   |       |       |   |      |      |   |      |      |    |      |      |   |      |      |    |      |      |    |      |      |
| Cl               | 0.17   | 0.14                                                                                                                                                                                                                                                                                                                                                                                                                                                                                                                                                                                                       |         |        |        |        |       |       |   |       |       |   |       |       |   |      |      |   |      |      |    |      |      |   |      |      |    |      |      |    |      |      |
| Na               | 0.13   | 0.21                                                                                                                                                                                                                                                                                                                                                                                                                                                                                                                                                                                                       |         |        |        |        |       |       |   |       |       |   |       |       |   |      |      |   |      |      |    |      |      |   |      |      |    |      |      |    |      |      |
| Tb(III)          |        | <table border="1"> <thead> <tr> <th>Element</th><th>Atomic</th><th>Weight</th></tr> <tr> <th>Symbol</th><th>Conc.</th><th>Conc.</th></tr> </thead> <tbody> <tr> <td>O</td><td>41.97</td><td>41.97</td></tr> <tr> <td>C</td><td>39.2</td><td>38.76</td></tr> <tr> <td>N</td><td>7.29</td><td>6.49</td></tr> <tr> <td>P</td><td>7.71</td><td>7.49</td></tr> <tr> <td>Tb</td><td>2.47</td><td>3.09</td></tr> <tr> <td>S</td><td>0.89</td><td>1.95</td></tr> <tr> <td>Na</td><td>0.28</td><td>0.09</td></tr> <tr> <td>Cl</td><td>0.19</td><td>0.16</td></tr> </tbody> </table> <p>POH-A<sub>L</sub>PEI+Tb</p>  | Element | Atomic | Weight | Symbol | Conc. | Conc. | O | 41.97 | 41.97 | C | 39.2  | 38.76 | N | 7.29 | 6.49 | P | 7.71 | 7.49 | Tb | 2.47 | 3.09 | S | 0.89 | 1.95 | Na | 0.28 | 0.09 | Cl | 0.19 | 0.16 |
| Element          | Atomic | Weight                                                                                                                                                                                                                                                                                                                                                                                                                                                                                                                                                                                                     |         |        |        |        |       |       |   |       |       |   |       |       |   |      |      |   |      |      |    |      |      |   |      |      |    |      |      |    |      |      |
| Symbol           | Conc.  | Conc.                                                                                                                                                                                                                                                                                                                                                                                                                                                                                                                                                                                                      |         |        |        |        |       |       |   |       |       |   |       |       |   |      |      |   |      |      |    |      |      |   |      |      |    |      |      |    |      |      |
| O                | 41.97  | 41.97                                                                                                                                                                                                                                                                                                                                                                                                                                                                                                                                                                                                      |         |        |        |        |       |       |   |       |       |   |       |       |   |      |      |   |      |      |    |      |      |   |      |      |    |      |      |    |      |      |
| C                | 39.2   | 38.76                                                                                                                                                                                                                                                                                                                                                                                                                                                                                                                                                                                                      |         |        |        |        |       |       |   |       |       |   |       |       |   |      |      |   |      |      |    |      |      |   |      |      |    |      |      |    |      |      |
| N                | 7.29   | 6.49                                                                                                                                                                                                                                                                                                                                                                                                                                                                                                                                                                                                       |         |        |        |        |       |       |   |       |       |   |       |       |   |      |      |   |      |      |    |      |      |   |      |      |    |      |      |    |      |      |
| P                | 7.71   | 7.49                                                                                                                                                                                                                                                                                                                                                                                                                                                                                                                                                                                                       |         |        |        |        |       |       |   |       |       |   |       |       |   |      |      |   |      |      |    |      |      |   |      |      |    |      |      |    |      |      |
| Tb               | 2.47   | 3.09                                                                                                                                                                                                                                                                                                                                                                                                                                                                                                                                                                                                       |         |        |        |        |       |       |   |       |       |   |       |       |   |      |      |   |      |      |    |      |      |   |      |      |    |      |      |    |      |      |
| S                | 0.89   | 1.95                                                                                                                                                                                                                                                                                                                                                                                                                                                                                                                                                                                                       |         |        |        |        |       |       |   |       |       |   |       |       |   |      |      |   |      |      |    |      |      |   |      |      |    |      |      |    |      |      |
| Na               | 0.28   | 0.09                                                                                                                                                                                                                                                                                                                                                                                                                                                                                                                                                                                                       |         |        |        |        |       |       |   |       |       |   |       |       |   |      |      |   |      |      |    |      |      |   |      |      |    |      |      |    |      |      |
| Cl               | 0.19   | 0.16                                                                                                                                                                                                                                                                                                                                                                                                                                                                                                                                                                                                       |         |        |        |        |       |       |   |       |       |   |       |       |   |      |      |   |      |      |    |      |      |   |      |      |    |      |      |    |      |      |

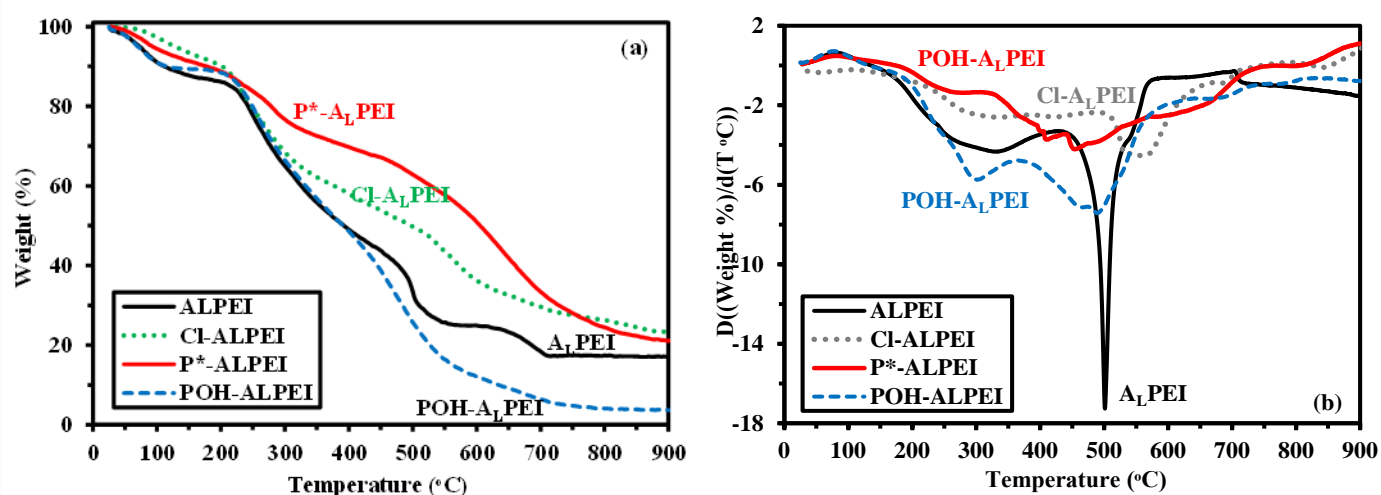

**Figure 1.** Thermal degradation of A<sub>L</sub>PEI beads, intermediary products (epichlorohydrine-activated A<sub>L</sub>PEI, Cl-A<sub>L</sub>PEI, and phosphorylated A<sub>L</sub>PEI beads, P\*-A<sub>L</sub>PEI), and sorbent (de-esterified phosphorylated beads, POH-A<sub>L</sub>PEI): (a) TGA, and (b) DrTG.

| Material               | Transition Range (°C) | Extrema DrTG (°C)           | Weight loss (%) | Total weight Loss (%) |
|------------------------|-----------------------|-----------------------------|-----------------|-----------------------|
| A <sub>L</sub> PEI     | 27.81-197.81          |                             | 13.74           | 82.87                 |
|                        | 197.81-481.01         | 319.09                      | 46.90           |                       |
|                        | 481.01-638.81         | 500.21                      | 15.38           |                       |
|                        | 638.81-909.41         | 696.61                      | 6.85            |                       |
| Cl-A <sub>L</sub> PEI  | 36.01-195.01          | 58.01                       | 9.40            | 76.65                 |
|                        | 195.01-497.81         | 301.01-406.41               | 40.63           |                       |
|                        | 497.81-909.61         | 530.41-549.01-674.77-836.02 | 26.62           |                       |
| P*-A <sub>L</sub> PEI  | 27.63-227.63          |                             | 13.78           | 78.94                 |
|                        | 227.63-445.43         | 253.83-406.8                | 18.83           |                       |
|                        | 445.43-909.23         | 449.02-792.63               | 46.33           |                       |
| POH-A <sub>L</sub> PEI | 24.86-194.86          |                             | 11.35           | 96.24                 |
|                        | 194.86-549.26         | 290.06-455.26-480.2         | 72.16           |                       |
|                        | 549.26-909.26         | 671.06-768.5                | 12.72           |                       |



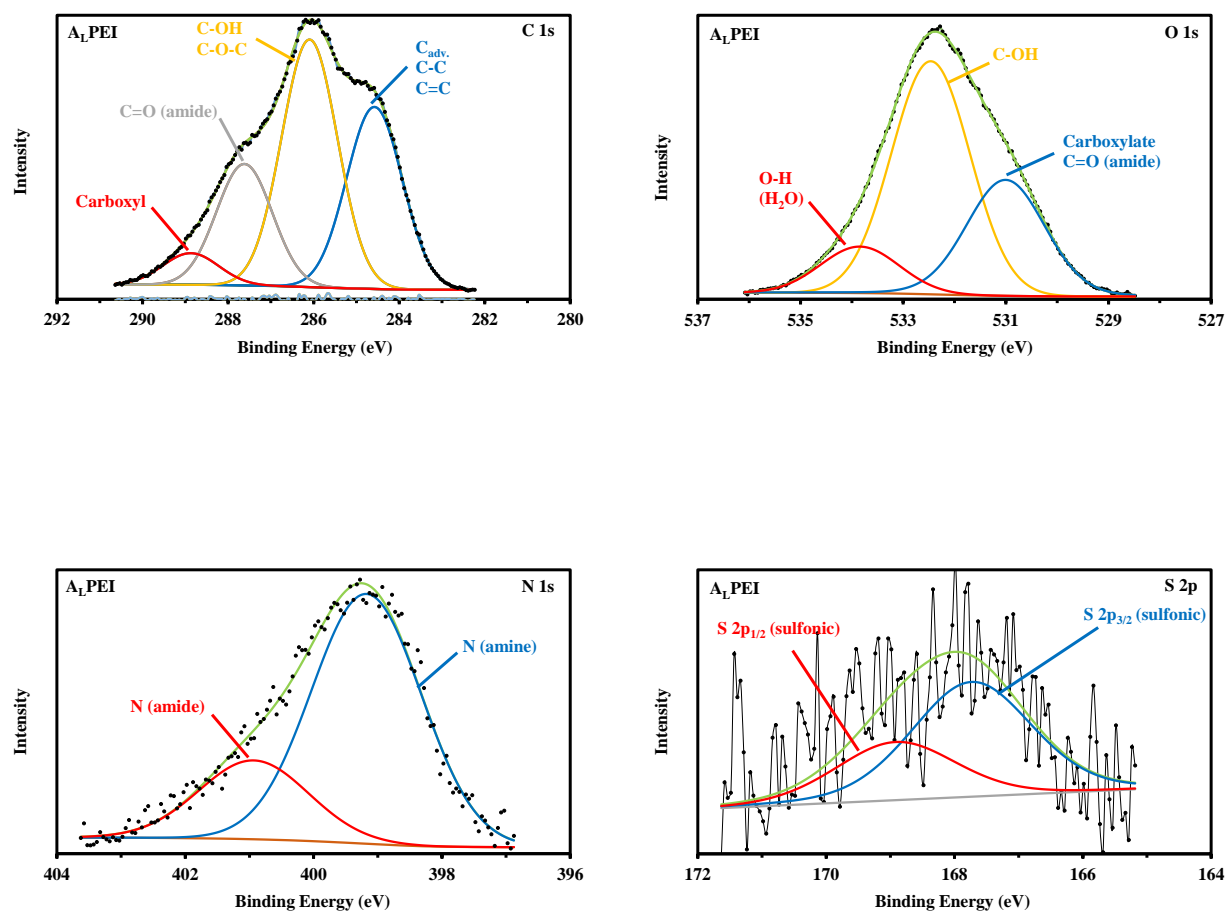

**Figure 4.** HRES XPS C 1s, O 1s, N 1s and S 2p core level spectra for AlPEI.

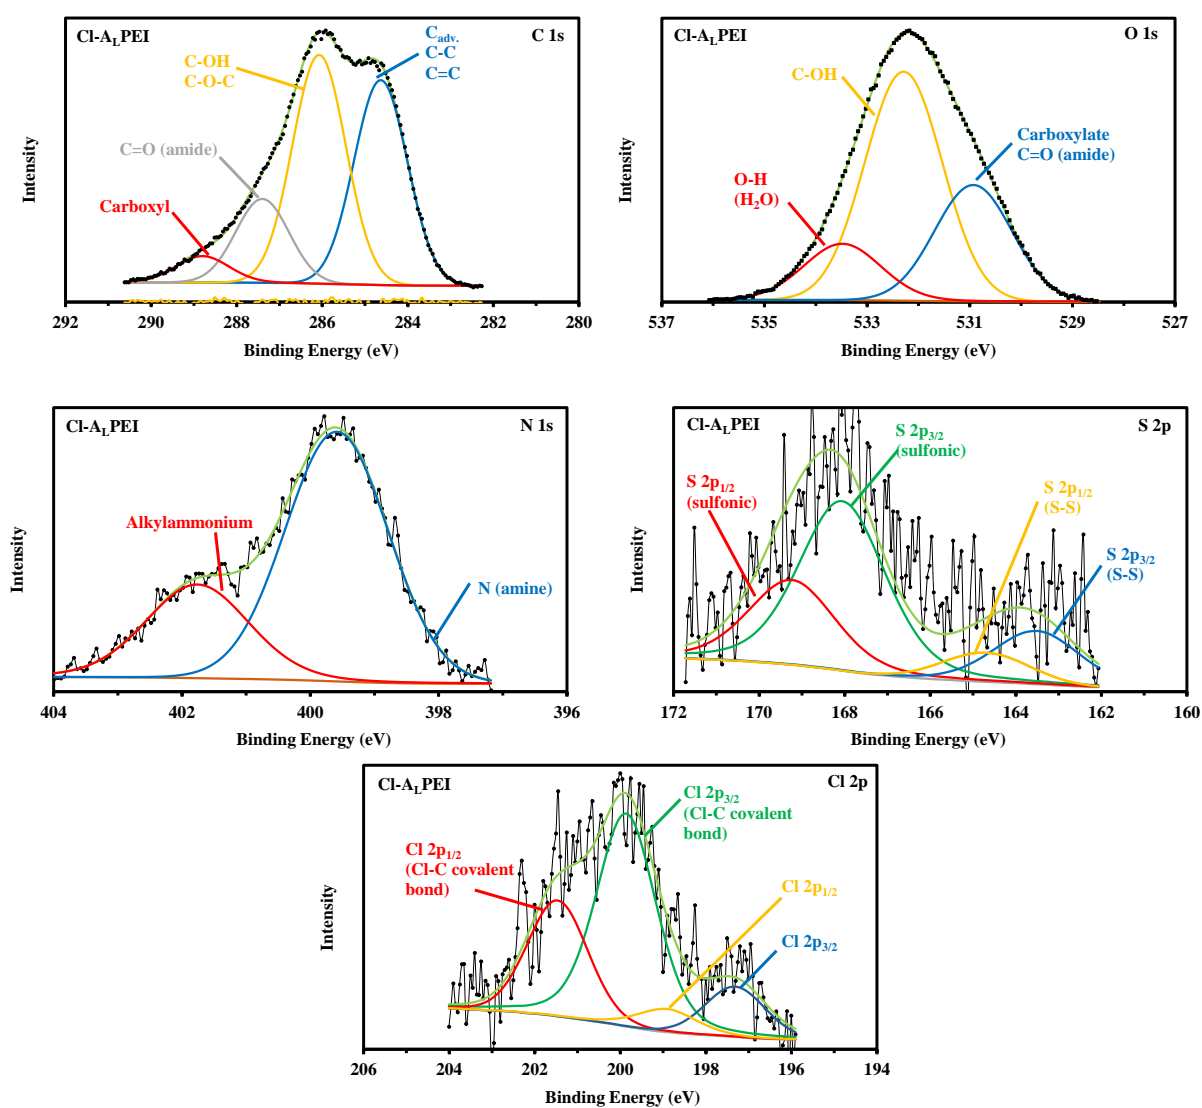

**Figure 5.** HRES XPS C 1s, O 1s, N 1s, S 2p and Cl 2p core level spectra for Cl-A<sub>1</sub>PEI.



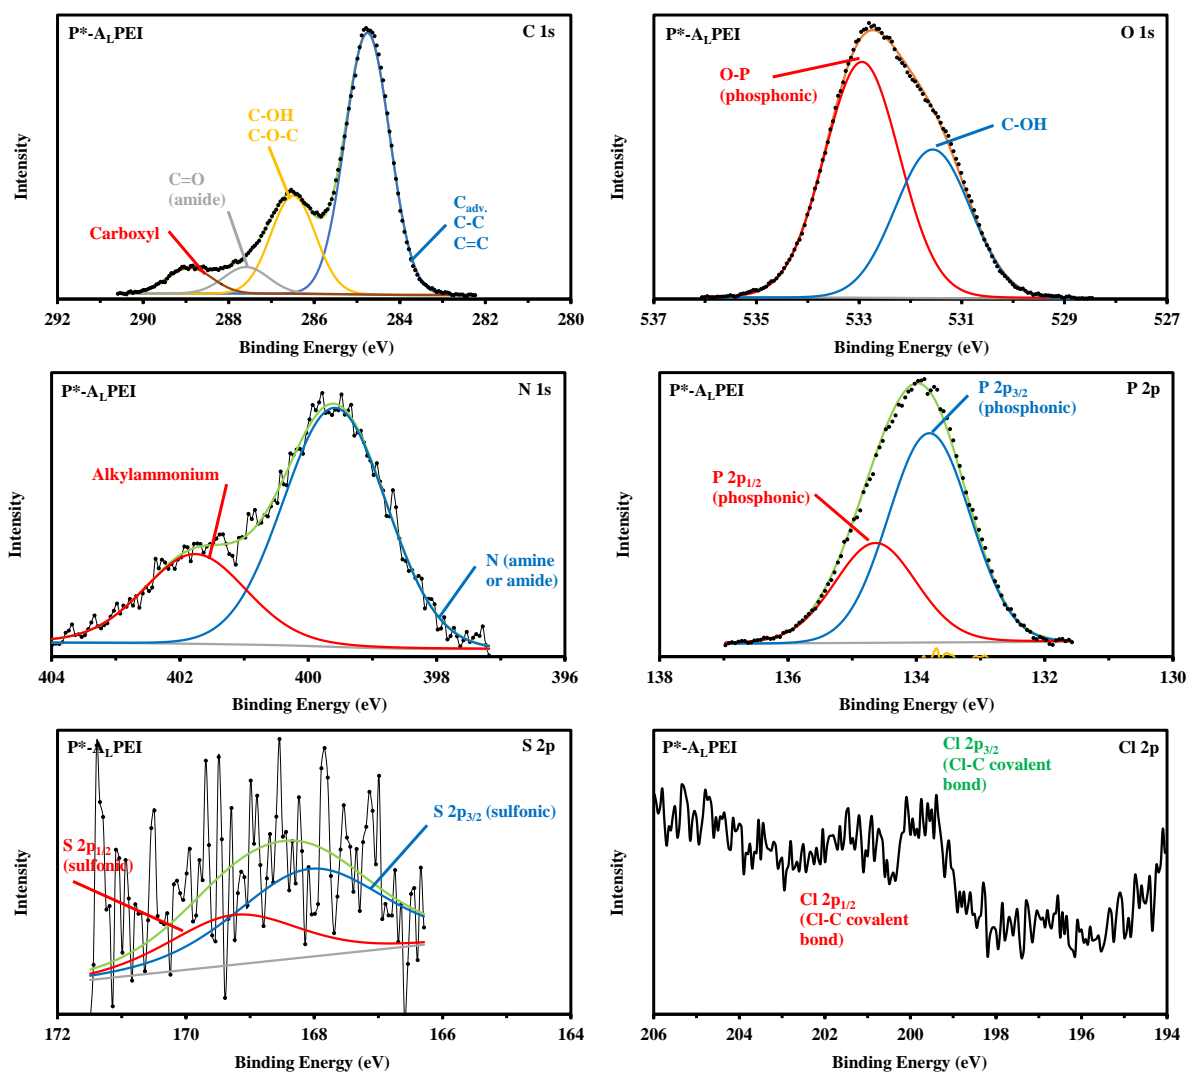

**Figure S6.** HRES XPS C 1s, O 1s, N 1s, P 2p, S 2p and Cl 2p core level spectra for POH-A<sub>1</sub>PEI.

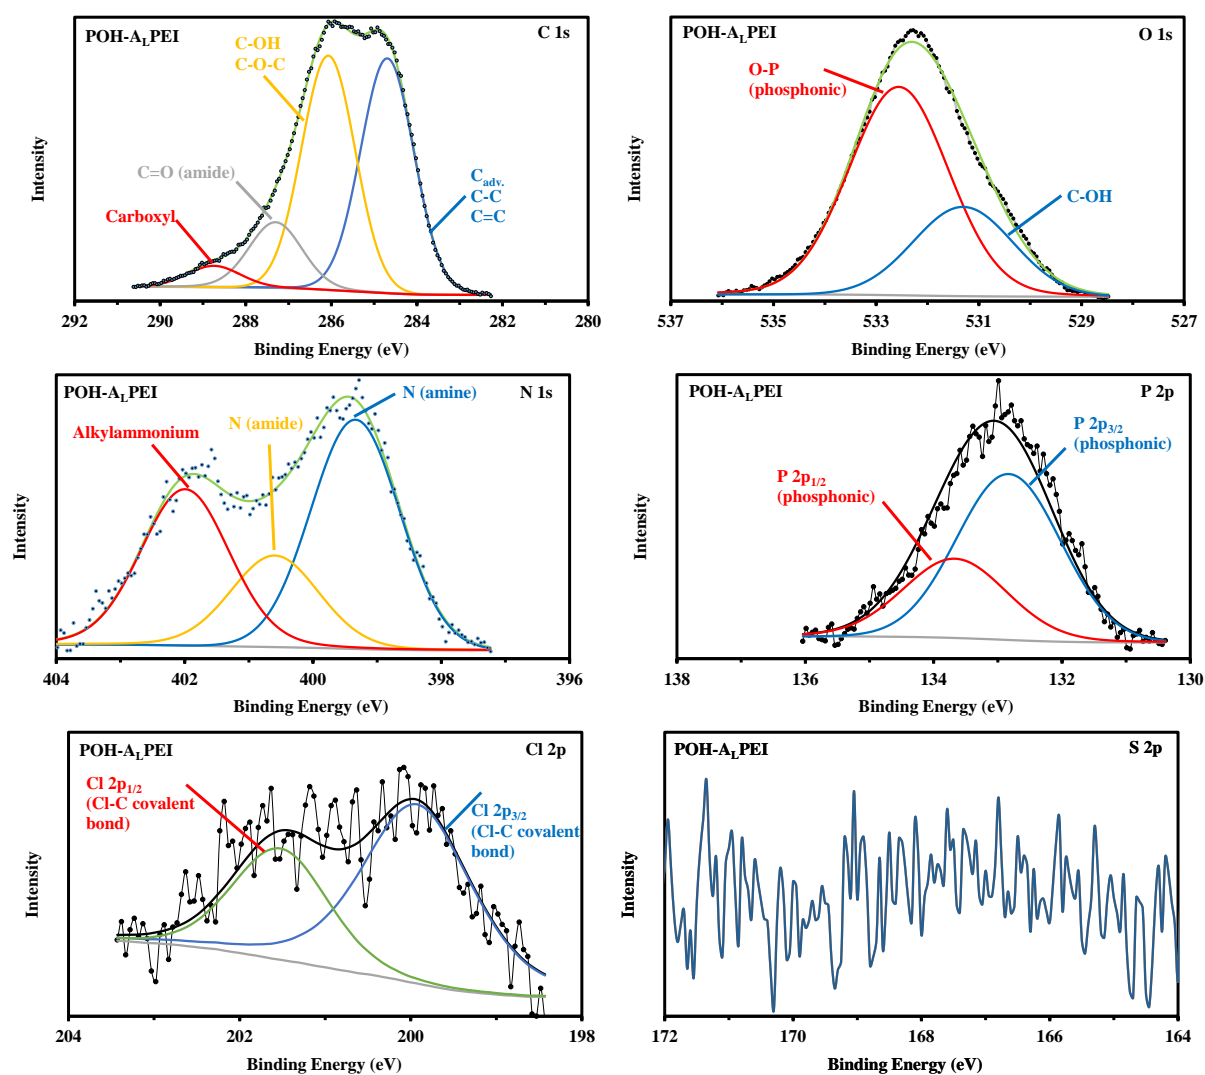

Figure 7. HRES XPS C 1s, O 1s, N 1s, P 2p, Cl 2p and S 2p core level spectra for POH-A<sub>L</sub>PEI.

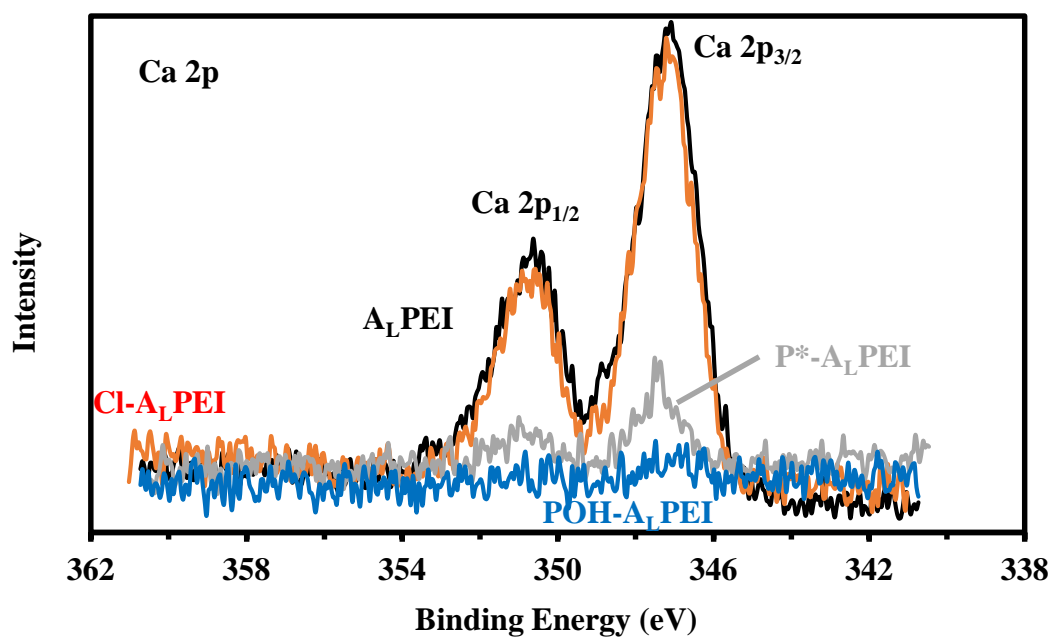

**Figure 8.** HRES XPS Ca 2*p* core level spectra for A<sub>L</sub>PEI, Cl-A<sub>L</sub>PEI, P\*-A<sub>L</sub>PEI and POH-A<sub>L</sub>PEI.

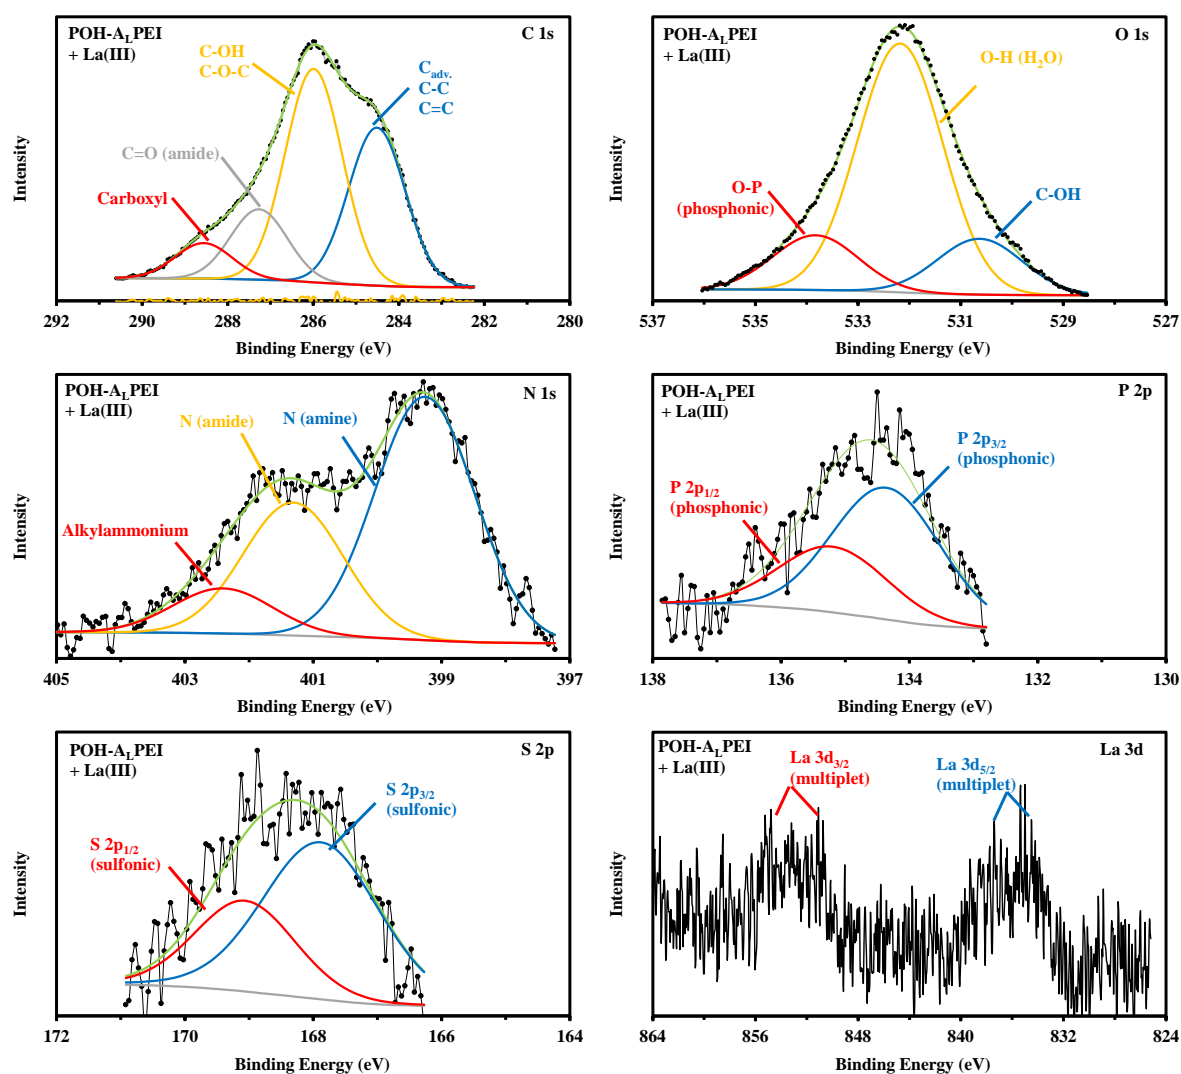

**Figure 9.** HRES XPS C 1s, O 1s, N 1s, P 2*p*, S 2*p* and La 3*d* core level spectra for POH-A<sub>L</sub>PEI after La (III) sorption.

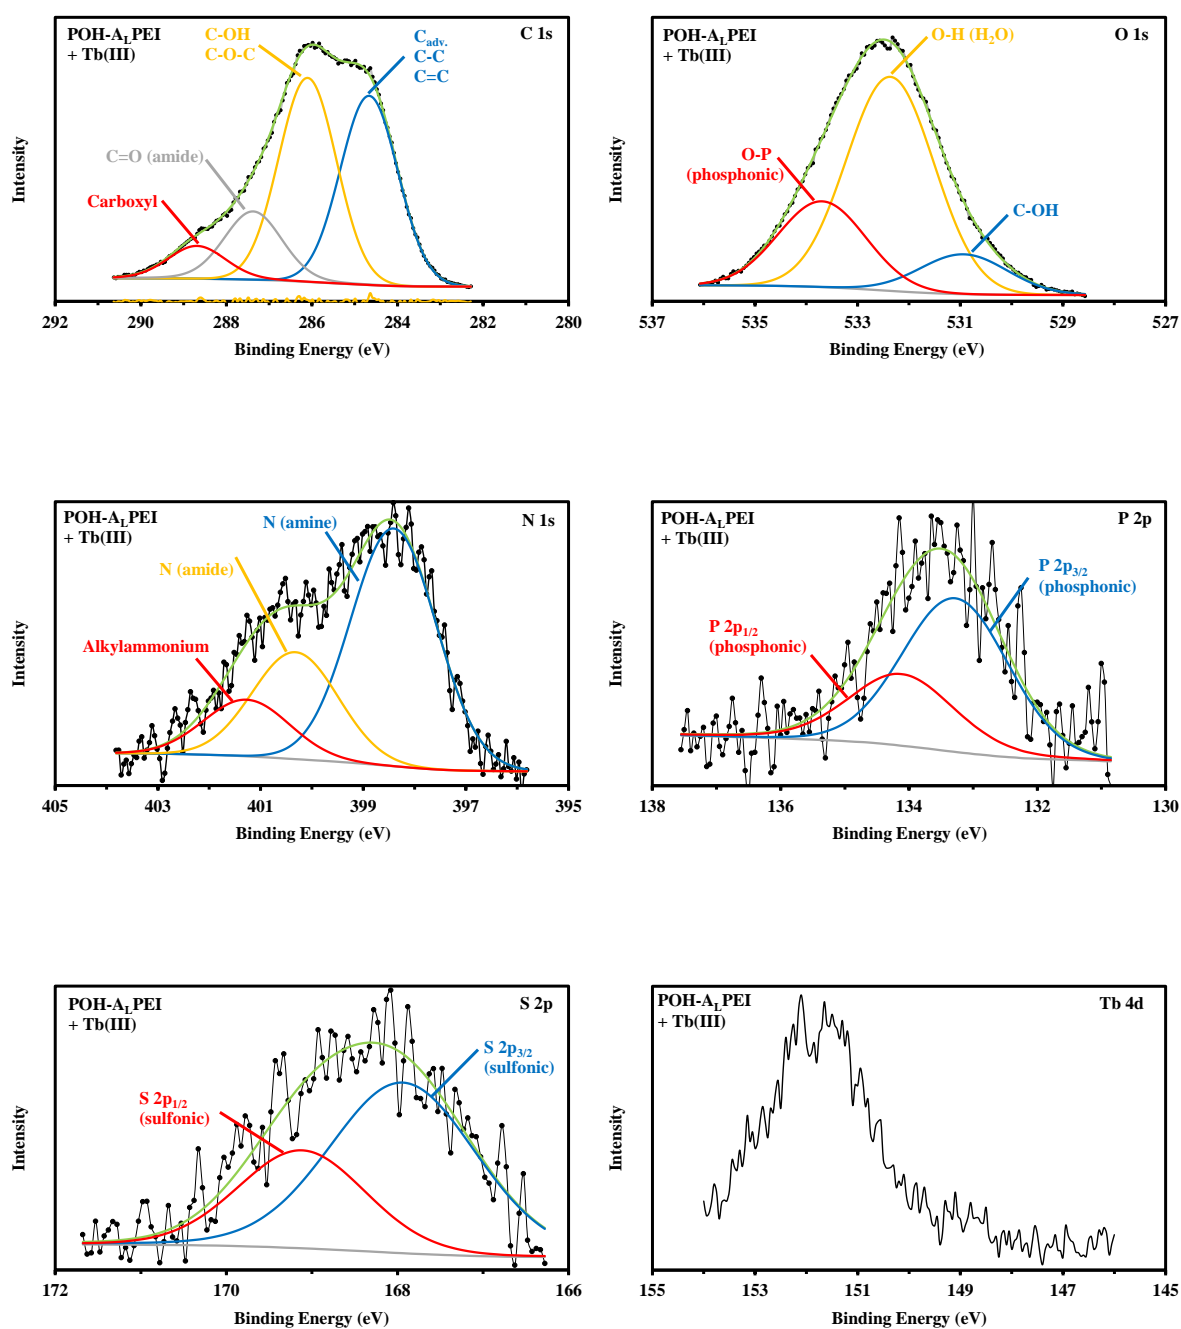

**Figure 10.** HRES XPS C 1s, O 1s, N 1s, P 2p, S 2p and Tb 4d core level spectra for POH-A<sub>L</sub>PEI after Tb (III) sorption.

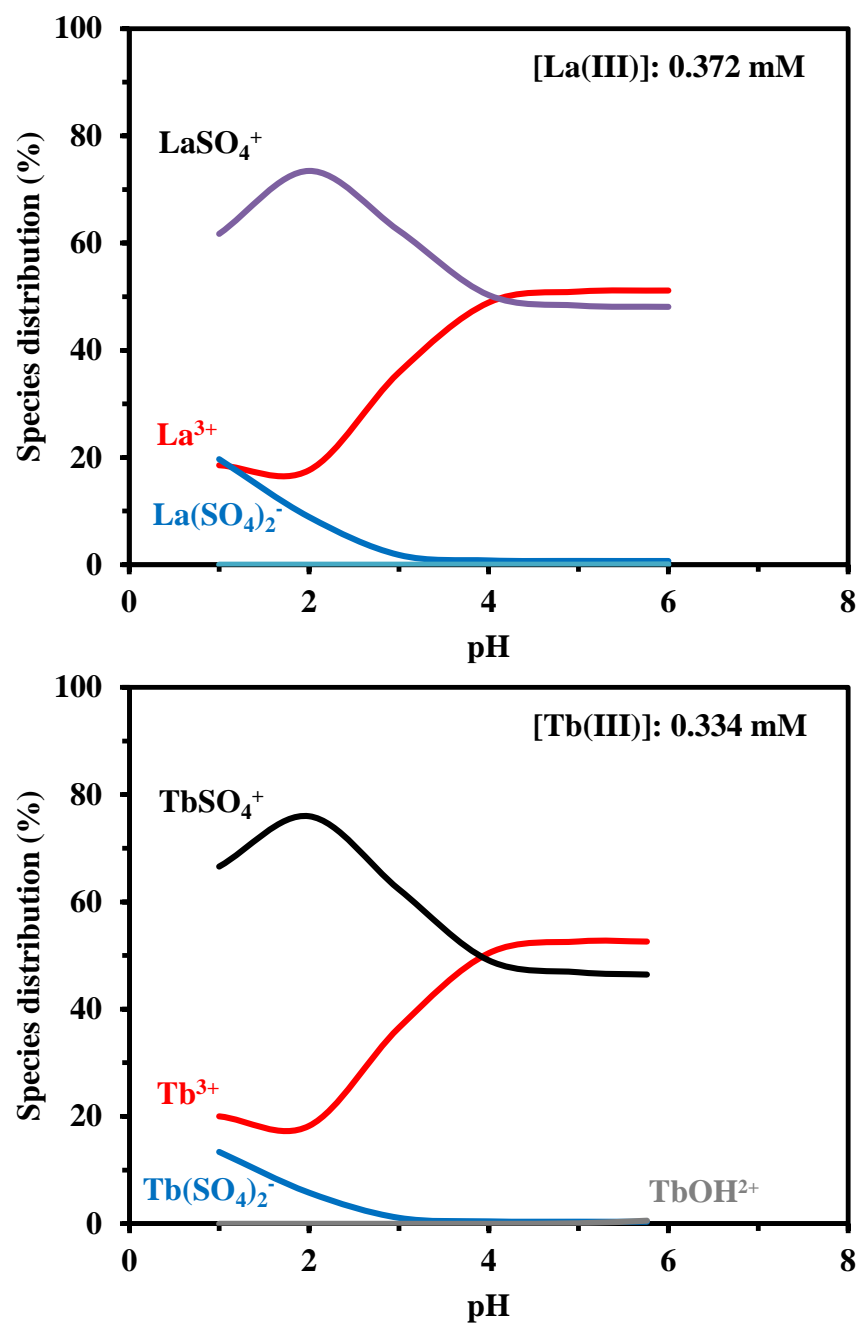

**Figure 11.** Speciation diagrams for La (III) and Tb (III) (under experimental conditions corresponding to the study of pH effect:  $C_0$ : 0.372 mmol La L<sup>-1</sup> and 0.334 mmol Tb L<sup>-1</sup>).

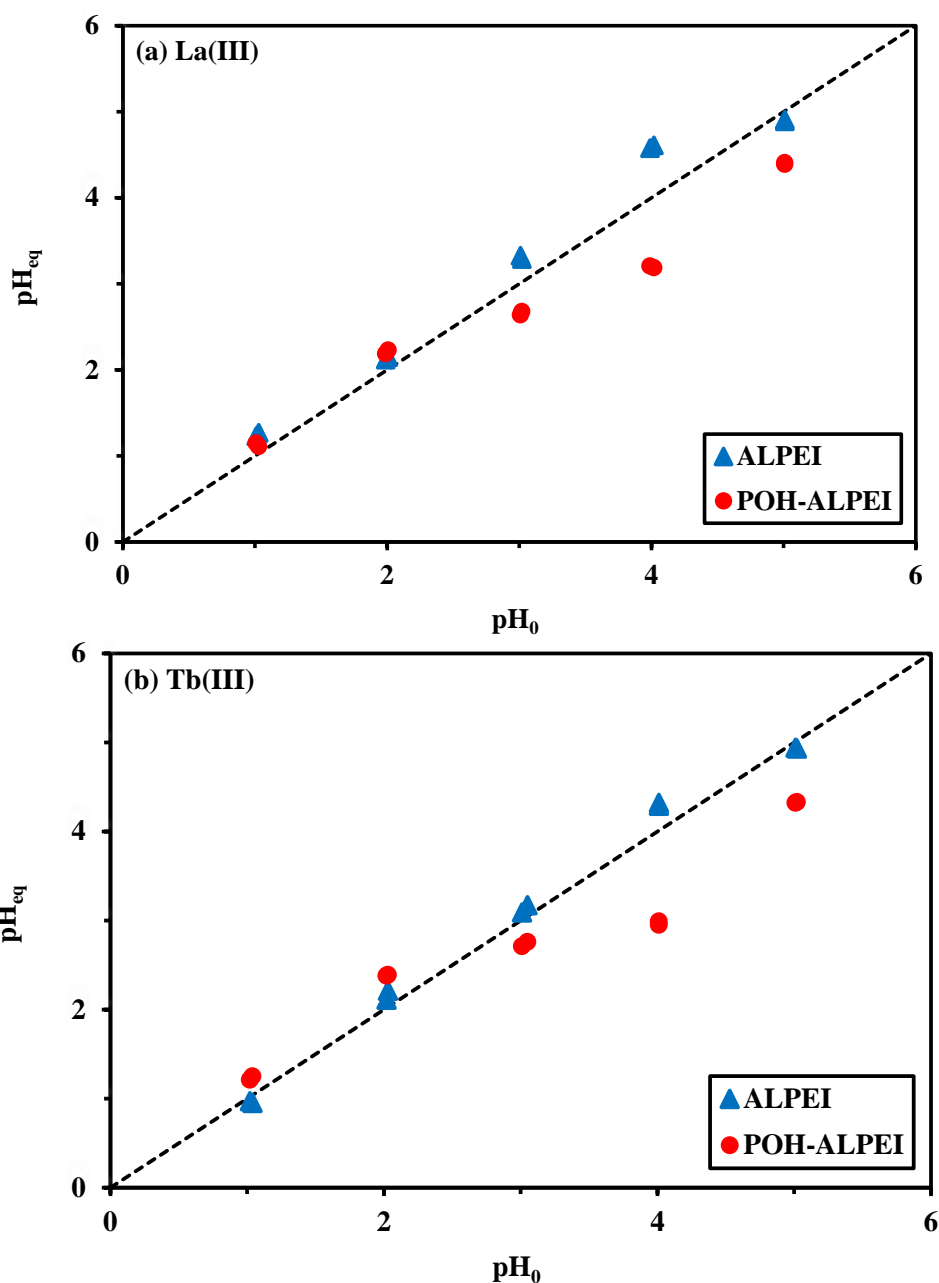

**Figure 12.** pH variation during La (III) (a) and Tb (III) (b) sorption using ALPEI and POH-ALPEI sorbents ( $C_0$ : 50 mg L<sup>-1</sup> = 0.374 mmol La L<sup>-1</sup> or 0.332 mmol Tb L<sup>-1</sup>; Sorbent dosage, SD: 0.66 g L<sup>-1</sup>; time: 48 h; T: 21 ±1 °C).

## References

1. Coates, J., Interpretation of Infrared Spectra, A Practical Approach. In *Encyclopedia of Analytical Chemistry*, Meyers, R. A., Ed. John Wiley & Sons Ltd: Chichester, U.K., 2000; pp 10815-10837.
2. Coates, J., Interpretation of Infrared Spectra, A Practical Approach. In *Encyclopedia of Analytical Chemistry* John Wiley & Sons, Ltd.: 2006; pp 1-23.
3. Hamza, M. F.; Abdel-Rahman, A. A. H.; Guibal, E., Magnetic glutamine-grafted polymer for the sorption of U(VI), Nd(III) and Dy(III). *J. Chem. Technol. Biotechnol.* **2018**, 93, (6), 1790-1806.
4. Mohammadi, N.; Ganesan, A.; Chantler, C. T.; Wang, F., Differentiation of ferrocene D-5d and D-5h conformers using IR spectroscopy. *J. Organomet. Chem.* **2012**, 713, 51-59.
5. Chen, Y.; Geng, J.; Zhuang, Y.; Zhao, J.; Chu, L.; Luo, X.; Zhao, Y.; Guo, Y., Preparation of the chitosan grafted poly (quaternary ammonium)/Fe<sub>3</sub>O<sub>4</sub> nanoparticles and its adsorption performance for food yellow 3. *Carbohydr. Polym.* **2016**, 152, 327-336.
6. Colthup, N. B.; Daly, L. H.; Wiberley, S. E., *Introduction to Infrared and Raman Spectroscopy*. 3rd. ed. ed.; Academic Press, Inc.: San Diego, CA (USA), 1990; p 560.

7. Hu, X. J.; Wang, J. S.; Liu, Y. G.; Li, X.; Zeng, G. M.; Bao, Z. L.; Zeng, X. X.; Chen, A. W.; Long, F., Adsorption of chromium (VI) by ethylenediamine-modified cross-linked magnetic chitosan resin: Isotherms, kinetics and thermodynamics. *J. Hazard. Mater.* **2011**, 185, (1), 306-314.
8. Benning, L. G.; Phoenix, V. R.; Yee, N.; Tobin, M. J., Molecular characterization of cyanobacterial silicification using synchrotron infrared micro-spectroscopy. *Geochim. Cosmochim. Acta* **2004**, 68, (4), 729-741.
9. Dean, A. P.; Martin, M. C.; Sigee, D. C., Resolution of codominant phytoplankton species in a eutrophic lake using synchrotron-based Fourier transform infrared spectroscopy. *Phycologia* **2007**, 46, (2), 151-159.
10. Giordano, M.; Kansiz, M.; Heraud, P.; Beardall, J.; Wood, B.; McNaughton, D., Fourier transform infrared spectroscopy as a novel tool to investigate changes in intracellular macromolecular pools in the marine microalga *Chaetoceros muellerii* (Bacillariophyceae). *J. Phycol.* **2001**, 37, (2), 271-279.
11. Nandiyanto, A. B. D.; Oktiani, R.; Ragadhita, R., How to read and interpret FTIR spectroscopy of organic material. *Indones. J. Sci. Technol.* **2019**, 4, (1), 97-118.
12. Cochez, M.; Ferriol, M.; Weber, J. V.; Chaudron, P.; Oget, N.; Mieloszynski, J. L., Thermal degradation of methyl methacrylate polymers functionalized by phosphorus-containing molecules - I. TGA/FT-IR experiments on polymers with the monomeric formula  $\text{CH}_2\text{C}(\text{CH}_3)\text{C}(\text{O})\text{OCH}_2\text{P}(\text{O})(\text{OC}_2\text{H}_5)_2$  ( $\text{R}=\text{H}$ ,  $(\text{CH}_2)_4\text{CH}_3$ ,  $\text{C}_6\text{H}_5\text{Br}$ ,  $\text{C}_{10}\text{H}_7$ ). *Polym. Degrad. Stab.* **2000**, 70, (3), 455-462.
13. Wei, Y.; Salih, K. A. M.; Rabie, K.; Elwakeel, K. Z.; Zayed, Y. E.; Hamza, M. F.; Guibal, E., Development of phosphoryl-functionalized algal-PEI beads for the sorption of Nd(III) and Mo(VI) from aqueous solutions – Application for rare earth recovery from acid leachates. *Chem. Eng. J.* **2021**, Art. N° 127399.
14. Zhao, Z.; Xie, X.; Wang, Z.; Tao, Y.; Niu, X.; Huang, X.; Liu, L.; Li, Z., Immobilization of *Lactobacillus rhamnosus* in mesoporous silica-based material: An efficiency continuous cell-recycle fermentation system for lactic acid production. *J. Biosci. Bioeng* **2016**, 121, (6), 645-651.
15. Namdeo, M.; Bajpai, S. K., Chitosan-magnetite nanocomposites (CMNs) as magnetic carrier particles for removal of Fe(III) from aqueous solutions. *Colloids Surf., A* **2008**, 320, (1-3), 161-168.
16. Oshita, K.; Takayanagi, T.; Oshima, M.; Motomizu, S., Adsorption behavior of cationic and anionic species on chitosan resins possessing amino acid moieties. *Anal. Sci.* **2007**, 23, (12), 1431-1434.
17. Zhang, X.; Jiao, C.; Wang, J.; Liu, Q.; Li, R.; Yang, P.; Zhang, M., Removal of uranium(VI) from aqueous solutions by magnetic Schiff base: Kinetic and thermodynamic investigation. *Chem. Eng. J.* **2012**, 198, 412-419.
18. Hamza, M. F.; Roux, J.-C.; Guibal, E., Uranium and europium sorption on amidoxime-functionalized magnetic chitosan micro-particles. *Chem. Eng. J.* **2018**, 344, 124-137.
19. Sifontes, A. B.; Canizales, E.; Toro-Mendoza, J.; Avila, E.; Hernandez, P.; Delgado, B. A.; Brenda Gutierrez, G.; Diaz, Y.; Cruz-Barrios, E., Obtaining highly crystalline barium sulphate nanoparticles via chemical precipitation and quenching in absence of polymer stabilizers. *J. Nanomater.* **2015**, 2015, Art. N° 510376.
